# Supplementary material for: Rule-Based Cell Systems Model of Aging using Feedback Loop Motifs Mediated by Stress Responses
Source: PLOS journal article supplement (doi:10.1371/journal.pcbi.1000820), 2010-06-17
Supplement: S1 (10.1371/journal.pcbi.1000820.s001) [file journal.pcbi.1000820.s001]

## Supplement Protocol S1 – Bionet Program Listings

### Vicious Cycle (VC) Model

```
# Hypothesis Vicious Cycle
#
# Jan 5, 2010
#
nFuzzyStates 6
```

```
starttime 0.0
endtime 40.0
ntimesteps 10000
```

```
PopulationSize 1
nGenerations 1
mutationRate 0.05
```

Exp

```
# Define variables to be plotted
Plot ROS
# Level of Free Radicals
Plot OxProt
# Level of oxidized proteins
Plot MRSP
# Mitochondrial Respiration
Plot ATP
# ATP levels
Plot ADP
# ADP levels
Plot Energy_tot
# Plot total energy consumed
Plot ATPconsume
# Plot total energy consumed
Plot ProtBiosynth
# Biosynthesis Activity levels
#
# Define nodes, start with initial condition
# High ATP and Biosynthesis, ROS and NF-kB set low
Node ATP 0.70
Node ADP 0.70
Node ATPconsume 0.8
Node Energy_tot 0.0
Node MRSP 0.80
Node ROS 0.1
Node OxProt 0.0
Node ProtBiosynth 0.8
#
```

```

# PROCESSES
#
# 01 Free radical levels
#
Reaction OXROT_ROS 0.1
  pro OxProt 5 5 5 5 0
  act ROS
# Protein Turnover
Reaction OxProt_Bio 0.1
  pro OxProt 5 5 5 5 0
  inh ProtBiosynth
#
#Reaction ROS scavenged/absorbed
#
Reaction ROS_decay 0.4
  sub ROS 1 2 3 4 5 5
#
#
# 02 Mitochondrial activity
#
# Damage by ROS inhibits mitochondrial respiration
#
# Mitochondrial respiration (MRSP) activated by ADP
Reaction MRSP_activation 0.8
  pro MRSP 5 5 5 5 5
  act ADP
# Any damage reduces MRSP
#
Reaction MRSP_inhibition 0.15
  sub MRSP 5 5 5 5 5
  act OxProt
Reaction MRSP_ATP 1.0
  pro ATP 5 5 5 5 0
  act MRSP
Reaction MRSP_ADP 1.0
  sub ADP 5 5 5 5 5
  act MRSP
# ROS generation related to mitochondrial activity and damage
Reaction ROS_produced 0.25
  pro ROS 5 5 5 5 0
  act MRSP
Reaction ROS_produced 0.50
  pro ROS 5 5 5 5 0
  act OxProt
#
Reaction MRSP_deactivation 0.8
  sub MRSP 5 5 5 5 5
  act ATP
#
# Autophagy
#

```

```

Reaction Autophagy_OXPROT 0.15
  sub OxProt 1 2 3 4 5 5
  act ATP
#
# 03 ER Reactions
#
# Biosynth inhibited by oxidized proteins, damage to ER
#
# Production of ADP
Reaction Biosynth_act 1.0
  pro ATPconsume 5 5 5 5 5 0
  act ATP
# Effective Protein Synthesis
Reaction ProteinSynth 0.20
  sub ProtBiosynth 5 5 5 5 5 5
  inh ATPconsume 5 4 3 2 0 0
#
# Inhibition of biosynthesis by damaged ribosomes
#
Reaction Biosynth_OXPROT_inh 0.01
  sub ATPconsume 5 5 5 5 5 5
  act OxProt
Reaction ATP_used 1.0
  sub ATP 5 5 5 5 5 5
  act ATPconsume
Reaction Biosynth_ADP 1.0
  pro ADP 5 5 5 5 5 0
  act ATPconsume
#
# total acc. energy consumed
#
Reaction Energy_totals 0.015
  pro Energy_tot 5 5 5 5 5 5
  act ATPconsume
#
Reaction Biosynth_consumed 1.0
  sub ATPconsume 5 5 5 5 5 5
  act ADP
#
# end of input file

```

## Adaptive Response (AR) Model

```
#
# Adaptive Response Model
# NF-kB & mTor
# Jan 5, 2010
#
nFuzzyStates 6

starttime 0.0
endtime 40.0
ntimesteps 10000

PopulationSize 1
nGenerations 1
mutationRate 0.05

Exp

# Define variables to be plotted
#

Plot ROS
# Level of free radicals
Plot OxProt
# Level of oxidized proteins
Plot MRSP
# Mitochondrial respiration
Plot ATP
# ATP levels
Plot Energy_tot
# Total Energy turnover
Plot ADP
# ADP levels
Plot ATPconsume
# Protein Synthesis
Plot ProtBiosynth
# Biosynthesis activity
Plot NFkB
# NFkB levels
Plot MTOR
#Plot of mTor activity
#
# Define nodes, start with initial condition
# ATP and Biosynthesis high, ROS and NF-kB set low
#
Node ATP 0.70
Node ADP 0.70
```

Node ATPconsume 0.80  
Node ProtBiosynth 0.8  
Node Energy\_tot 0.0  
Node MRSP 0.80  
Node NFkB 0.07  
Node MTOR 0.4  
Node ROS 0.1  
Node OxProt 0.0  
#  
# PROCESSES  
#  
#  
# 01 Free radical levels  
#  
# ROS causes increase in oxidized proteins  
#  
Reaction OXPROT\_ROS 0.1  
  pro OxProt 5 5 5 5 0  
  act ROS  
# Oxidation dependent on protein turnover  
Reaction OXPROT\_Bio 0.1  
  pro OxProt 5 5 5 5 0  
  inh ProtBiosynth  
#  
Reaction ROS\_decay 0.4  
  sub ROS 1 2 3 4 5 5  
# NFkB activates scavengers was 0.2  
Reaction ROS\_scavenge 0.2  
  sub ROS 1 2 3 4 5 5  
  act NFkB  
#  
# 02 Mitochondrial activity and ATP generation  
#  
#  
# Buildup of mitochondrial respiration inhibited by ROS  
#  
# Addtl. ATP generated by glycolysis mediated by mTOR and NF-kB  
#  
Reaction Glycolysis\_ATP 0.75  
  pro ATP 5 5 5 5 0  
  act MTOR 5 3 0 0 0  
# ADP consumed by Glycolysis  
Reaction ADP\_Glycolysis 0.75  
  sub ADP 0 5 5 5 5  
  act MTOR 5 3 0 0 0  
#  
Reaction Glycolysis\_NFkB\_ATP 0.1  
  pro ATP 5 5 5 5 0  
  act NFkB 0 0 1 2 3 4  
# ADP consumed by Glycolysis  
Reaction ADP\_NFkB\_Glycolysis 0.1

```

sub ADP 0 5 5 5 5 5
act NFKB 0 0 1 2 3 4
# Remaining ADP builds potential for mitochondrial respiration
#
Reaction MRSP_activation 0.8
pro MRSP 5 5 5 5 5 5
act ADP
#
#
# Downregulation of mitochondrial respiration by stress response
#
Reaction MRSP_change 0.15
sub MRSP 5 5 5 5 5 5
act MTOR 2 1 0 0 0 0
Reaction MRSP_change 0.15
pro MRSP 5 5 5 5 5 5
act MTOR 0 0 0 1 2 3
#
Reaction MRSP_inhibition 0.15
sub MRSP 5 5 5 5 5 5
act OxProt
# NFKB inhibits MRSP
Reaction NFKB_MRSP 0.05
sub MRSP 5 5 5 5 5 5
act NFKB
#
Reaction MRSP_ATP 1.0
pro ATP 5 5 5 5 5 0
act MRSP
Reaction MRSP_ADP 1.0
sub ADP 5 5 5 5 5 5
act MRSP
#
Reaction ROS_produced 0.25
pro ROS 5 5 5 5 5 0
act MRSP
Reaction ROS_produced 0.50
pro ROS 5 5 5 5 5 0
act OxProt
#
# Autocrine loop NADPH Oxidase System
#
Reaction NADPHOXD_produced 0.1
pro ROS 5 5 5 5 5 0
act NFKB
Reaction MRSP_deactivation 0.8
sub MRSP 5 5 5 5 5 5
act ATP
#
# NF-kB degradation
#

```

```

Reaction NFkB_decay 0.4
  sub NFkB 0 1 2 3 4 5
#
# 03 Activation of Stress Response
# through ROS levels and oxidized proteins (1:1)
#
Reaction NFkB_Stress_ROS 0.25
  pro NFkB 5 5 5 5 5 0
  act ROS
Reaction NFkB_Stress_OXPROT 0.25
  pro NFkB 5 5 5 5 5 0
  act OxProt
#
# Activation of mTOR
# by low ATP levels
#
# >>>> For 20% less mTOR sensitivity constant is
#       decreased from 0.075 to 0.06
#
Reaction MTOR_ATP 0.075
  sub MTOR 0 1 5 5 5 5
  inh ATP
# Activation of mTOR by ROS
Reaction MTOR_ROS 0.08
  pro MTOR 5 5 5 1 1 0
  act ROS
#
# Autophagy
#
Reaction Autophagy_OXPROT 0.15
  sub OxProt 1 2 3 4 5 5
  act ATP
# Reaction Autophagy_MTOR 0.05
  sub OxProt 1 2 3 4 5 5
  act MTOR 5 2 1 0 0 0
#
# 03 ER Reactions
#
# ATP consumption inhibited by oxidized proteins
# damage to ER
#
# Production of ADP
Reaction Biosynth_act 1.0
  pro ATPconsume 5 5 5 5 5 0
  act ATP
#
# Relative Protein Synthesis Scaled
# >>>>> scaled to be 30% at 60% ATPconsume
#       for lower sensitivity of mTor rate is set to 0.06
#
Reaction ProteinSynth 0.07

```

```

sub ProtBiosynth 5 5 5 5 5
inh ATPconsume
#
# Oxidative damage to ribosomes
#
Reaction Biosynth_OXPROT_inh 0.01
sub ATPconsume 5 5 5 5 5
act OxProt
#
# Modulation of ATP consumption regulated by mTor
#
#
Reaction Biosynth_mTOR_inh 0.05
sub ATPconsume 5 5 5 5 5
act MTOR 5 3 0 0 0
#
Reaction Biosynth_mTOR_inh 0.05
pro ATPconsume 5 5 5 5 5
act MTOR 0 0 0 3 5 0
#
# Biosynthesis required for upregulated inflammatory proteins
#
Reaction Biosynth_NFKB_inflamm 0.05
pro ATPconsume 5 5 5 5 5
act NFKB
# Final ATP/ADP levels
Reaction ATP_used 1.0
sub ATP 5 5 5 5 5
act ATPconsume
Reaction Biosynth_ADP 1.0
pro ADP 5 5 5 5 5 0
act ATPconsume
#
# total accumulated energy turnover
#
Reaction Energy_totals 0.015
pro Energy_tot 5 5 5 5 5
act ATPconsume
#
Reaction Biosynth_consumed 1.0
sub ATPconsume 5 5 5 5 5
act ADP
#
# end of input file

```
