# Supplementary material for: Rule-Based Cell Systems Model of Aging using Feedback Loop Motifs Mediated by Stress Responses
Source: PLoS Comput Biol. 2010 Jun 17;6(6):e1000820. doi: 10.1371/journal.pcbi.1000820 (PMC2887462; doi:10.1371/journal.pcbi.1000820)
Supplement: Table S1 — List of processes and rate constants. (0.08 MB PDF) [file pcbi.1000820.s002.pdf]

**Supplemental Table S1: Processes and Rates****Table 1. Processes and reaction rates**

| Reaction name       |  | Rate CV model | Rate AR model | Description                                          |
|---------------------|--|---------------|---------------|------------------------------------------------------|
| OXPROT_ROS          |  | 0.1           | 0.1           | Protein oxidation by ROS                             |
| OXPROT_Bio          |  | 0.1           | 0.1           | Oxidation rate is increased by low biosynthesis      |
| ROS_decay           |  | 0.4           | 0.4           | ROS decays                                           |
| ROS_scavenge        |  | 0.2           | 0.2           | NFKB activates ROS scavengers                        |
| Glycolysis_ATP      |  | NA            | .75           | Production of ATP by glycolysis depending on mTOR    |
| ADP_Glycolysis      |  | NA            | .75           | Reduction of ADP if glycolysis active                |
| Glycolysis_NFKB_ATP |  | NA            | .75           | Production of ATP by glycolysis depending on NF-KB   |
| ADP_NFKB_Glycolysis |  | NA            | .75           | Reduction of ADP if NF-kB glycolysis active          |
| MRSP_activation     |  | 0.8           | 0.8           | Mitochondrial respiration is activated by ADP levels |
| MRSP_change         |  | NA            | 0.15          | Mito-Respiration is inhibited by low mTOR            |
| MRSP_change         |  | NA            | 0.15          | Mito-Respiration is activated by high mTOR           |
| MRSP_inhibition     |  | 0.15          | 0.15          | Mito-Respiration is inhibited by oxidized proteins   |
| NFKB_MRSP           |  | NA            | .05           | Mito-Respiration is inhibited by NFKB                |
| MRSP_ATP            |  | 1.0           | 1.0           | ATP is generated by Mito-Respiration                 |
| MRSP_ADG            |  | 1.0           | 1.0           | ADP is consumed by mito.-respiration                 |
| ROS_produced        |  | 0.25          | 0.25          | ROS generated by mito-respiration                    |
| ROS_produced        |  | 0.50          | 0.50          | ROS generated by oxidative damage to mitochondria    |
| NADPHOXD_produced   |  | NA            | 0.1           | NADPH oxidase system is activated and produces       |

| Reaction name         |  | Rate CV model | Rate AR model | Description                                                    |
|-----------------------|--|---------------|---------------|----------------------------------------------------------------|
|                       |  |               |               | ROS through autocrine loop depending on NFKB                   |
| MRSP_deactivation     |  | 0.8           | 0.8           | Mito-Respiration is deactivated with reference to ATP produced |
| NFKB_decay            |  | NA            | 0.4           | Decay of NFKB                                                  |
| NFKB_Stress_ROS       |  | NA            | 0.25          | Activation of NFKB by ROS                                      |
| NFKB_Stress_OXPROT    |  | NA            | 0.25          | Activation of NFKB by oxidized proteins                        |
| MTOR_ATP              |  | 0.06          | 0.06          | MTOR is activated by low ATP levels                            |
| MTOR_ROS              |  | 0.08          | 0.08          | MTOR is activated by high ROS levels                           |
| Autophagy_OXPROT      |  | 0.15          | 0.15          | Autophagy of oxidized proteins at constant rate                |
| Autophagy_MTOR        |  | NA            | 0.05          | Autophagy of proteins mediated by mTOR                         |
| Biosynth_act          |  | 1             | 1             | ATP consumption activated by ATP levels                        |
| ProteinSynth          |  | 0.06          | 0.06          | Protein biosynthesis scaled in relation to ATP consumption     |
| Biosynth_OXPROT_inh   |  | 0.01          | 0.01          | ATP consumption inhibited by oxidized proteins                 |
| Biosynth_mTOR_inh     |  | NA            | 0.05          | ATP consumption inhibited by low mTOR levels                   |
| Biosynth_mTOR_inh     |  | NA            | 0.05          | ATP consumption activated by high mTOR levels                  |
| Biosynth_NFKB_inflamm |  | NA            | 0.05          | Biosynthesis required for inflammatory related proteins        |
| ATP_used              |  | 1             | 1             | ATP levels reduced by ATP consumed                             |
| Biosynth_ADG          |  | 1             | 1             | ADP produced by level of biosynthesis                          |
| Energy_totals         |  | 0.015         | 0.015         | total accumulated energy turnover                              |
| Biosynth_consumed     |  | 1             | 1             | ATP consumption determined by biosynthesis                     |
